# Supplementary material for: Effect of flexible linker length on the activity of fusion protein 4-coumaroyl-CoA ligase::stilbene synthase
Source: Royal Society of Chemistry journal article supplement (doi:10.1039/c6mb00563b), 2017-01-24
Supplement: c6mb00563b1.pdf [file c6mb00563b1.pdf]

## Supplementary Data

### Effect of flexible linker length on the activity of fusion protein 4-coumaroyl-CoA

#### ligase::stilbene synthase

Huili Guo,<sup>a,#</sup> Yadong Yang,<sup>a,#</sup> Feiyan Xue,<sup>a,#</sup> Hong Zhang,<sup>a</sup> Tiran Huang,<sup>a</sup> Wenbin Liu,<sup>a</sup> Huan Liu,<sup>a</sup> Fenqiang Zhang,<sup>a</sup> Mingfeng Yang,<sup>a</sup> Chunmei Liu,<sup>a</sup> Heshu Lu,<sup>a\*</sup> Yansheng Zhang,<sup>b,\*</sup> and Lanqing Ma<sup>a,c,\*</sup>

**Supplementary Table 1.** Oligonucleotides used as primers for the PCR amplifications in this study.

| Name                             | Sequence (5'-3')                                                                       |
|----------------------------------|----------------------------------------------------------------------------------------|
| 4CL-up                           | TAAAGGATCCATGGCGCCACAAGAACAA                                                           |
| 4CL-dw                           | GCCACTCGAGTCACAATCCATTTGCTAG                                                           |
| STS-up                           | ATCAGGATCCATGGCAGCTTCAACTGAAGAGA                                                       |
| STS-dw                           | AGTACTCGAGTTAAATGATGGGCACATTCGT                                                        |
| linker-up                        | ATTTGGATCCATGGCGCCACAAGAACAA                                                           |
| linker-dw                        | TGATCTCGAGTTAAATGATGGGCACACT                                                           |
| linker-free-inter-end            | TCATCTCTTCAGTTGAAGCTGCCATCAATCCATTTGCTAGTTTTGCCCTC                                     |
| linker-free-inter-star           | GAGGGCAAACACTAGCAAATGGATTGATGGCAGCTTCAACTGAAGAGATGA                                    |
| (GSG) <sub>1</sub> -inter-end    | TCATCTCTTCAGTTGAAGCTGCCATGCCAGATCCCAATCCATTTGCTAGTTTTGCCCTCA                           |
| (GSG) <sub>1</sub> -inter-star   | GAGGGCAAACACTAGCAAATGGATTGGGATCTGGCATGGCAGCTTCAACTGAAGAGATGA                           |
| (GSG) <sub>2</sub> -inter-end    | TCTCTTCAGTTGAAGCTGCCATGCCAGATCCGCCAGATCCCAATCCATTTGCTAGTTTTGCC                         |
| (GSG) <sub>2</sub> -inter-star   | GGCAAACACTAGCAAATGGATTGGGATCTGGCGGATCTGGCATGGCAGCTTCAACTGAAGAGA                        |
| (GSG) <sub>3</sub> -inter-end    | CAGTTGAAGCTGCCATGCCAGATCCGCCAGATCCGCCAGATCCCAATCCATTTGCTAGT                            |
| (GSG) <sub>3</sub> -inter-star   | ACTAGCAAATGGATTGGGATCTGGCGGATCTGGCGGATCTGGCATGGCAGCTTCAACTG                            |
| (GSG) <sub>4</sub> -inter-end    | GTTGAAGCTGCCATGCCAGATCCGCCAGATCCGCCAGATCCGCCAGATCCCAATCCATTTGCTAG                      |
| (GSG) <sub>4</sub> -inter-star   | CTAGCAAATGGATTGGGATCTGGCGGATCTGGCGGATCTGGCGGATCTGGCATGGCAGCTTCAACT                     |
| (GSG) <sub>5</sub> -inter-end    | GTTGAAGCTGCCATgcccagatcccccagatcccccagatcccccagatcccccagatccCAATCCATTTGCT              |
| (GSG) <sub>5</sub> -inter-star   | CTAGCAAATGGATTgggatctggcgatctggcgatctggcgatctggcgatctggcgatctggcgATGGCAGCTTCAACT       |
| (GGGGS) <sub>1</sub> -inter-end  | TCTCTTCAGTTGAAGCTGCCATCGAGCCACCGCCACCAATCCATTTGCTAGTTTTGCC                             |
| (GGGGS) <sub>1</sub> -inter-star | GGCAAACACTAGCAAATGGATTGGGTGGCGGTGGCTCGATGGCAGCTTCAACTGAAGAGA                           |
| (GGGGS) <sub>2</sub> -inter-end  | CAGTTGAAGCTGCCATCGAGCCACCGCCACCCGAGCCACCGCCACCAATCCATTTGCTAGT                          |
| (GGGGS) <sub>2</sub> -inter-star | ACTAGCAAATGGATTGGTGGCGGTGGCTCGGGTGGCGGTGGCTCGATGGCAGCTTCAACTG                          |
| (GGGGS) <sub>3</sub> -inter-end  | AGTTGAAGCTGCCATcgagccaccgcccagccaccgcccagccaccgcccagccaccCAATCCATTTGCT                 |
| (GGGGS) <sub>3</sub> -inter-star | CTAGCAAATGGATTggtggcggtggctcggtggcggtggctcggtggcggtggctcggtggcggtggctcgATGGCAGCTTCAACT |
| (GGGGS) <sub>4</sub> -inter-end  | AGTTGAAGCTGCCATcgagccaccgcccagccaccgcccagccaccgcccagccaccgcccagccaccCAATCCATTTGCT      |
| (GGGGS) <sub>4</sub> -inter-star | CTAGCAAATGGATTggtggcggtggctcggtggcggtggctcggtggcggtggctcggtggcggtggctcgATGGCAGCTTCAACT |

**Note:** The underlined sequences in the 4CL-up, STS-up, and linker-up primers indicate the *Bam*HI site. The underlined sequences in the 4CL-dw, STS-dw, and linker-dw primers indicate the *Xho*I site. The underlined sequences in the other primers indicate the nucleotide sequences of the different linkers.

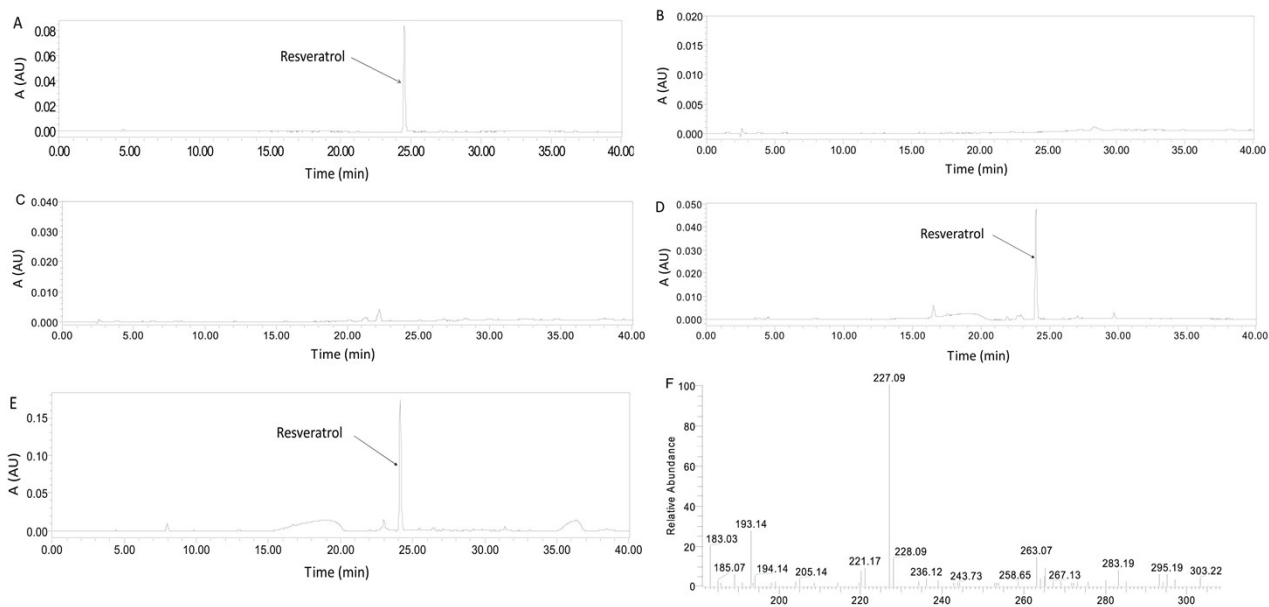

**Supplementary Fig. 1.** HPLC analysis of resveratrol produced in *S. cerevisiae* and *E. coli*. (A) HPLC profiles ( $A_{306nm}$ ) of the authentic standard of resveratrol. (B, C) HPLC profiles of culture media from *S. cerevisiae* and *E. coli* expressing 4CL or STS alone, produced no resveratrol. (D) HPLC profiles of culture media from *S. cerevisiae* transformed with 4CL-linker-STS. (E) HPLC profiles of culture media from *E. coli* transformed with 4CL-linker-STS. Peaks indicated are the products of resveratrol. (F) Identification of resveratrol by LC-MS.

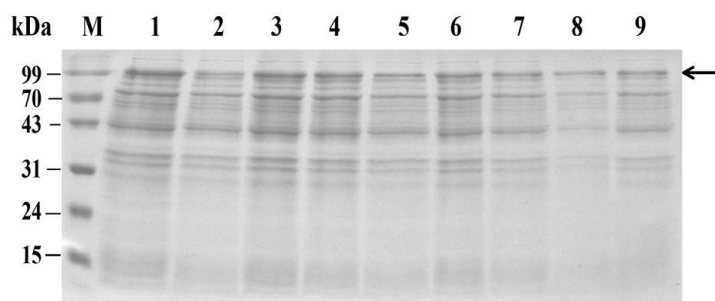

**Supplementary Fig. 2.** SDS-PAGE analysis of the nine total proteins from the cell lysate after incubation 48 h. Lane 1-5: the total proteins from engineered *E. coli* expressing 4CL-(GSG)<sub>n</sub>-STS ( $n \leq 5$ ), Lane 6-9: the total proteins from engineered *E. coli* expressing 4CL-(GGGS)<sub>n</sub>-STS ( $n \leq 4$ ). Target protein is indicated by arrow.
